# Supplementary material for: SARS‐CoV‐2–host proteome interactions for antiviral drug discovery
Source: PubMed Central journal article supplement (PMC8552907; doi:10.15252/msb.202110396), 2021-10-28
Supplement: MSB-17-e10396-s007.pdf [file MSB-17-e10396-s007.pdf]

## Expanded View Figures

**Figure EV1. Defining the host–receptor interaction landscape.**

- A Number of known interactions related to 18 host baits from each of the databases or publications used for constructing the known interaction database.
- B Number of previously identified interactions detected in one or more of the databases used.
- C Number of known interactions of each human receptor bait.
- D The number of high-confidence interactions (HCIs) identified by host baits using AP-MS or BioID-MS methods.
- E Human bait protein expression patterns vary greatly in different tissues.

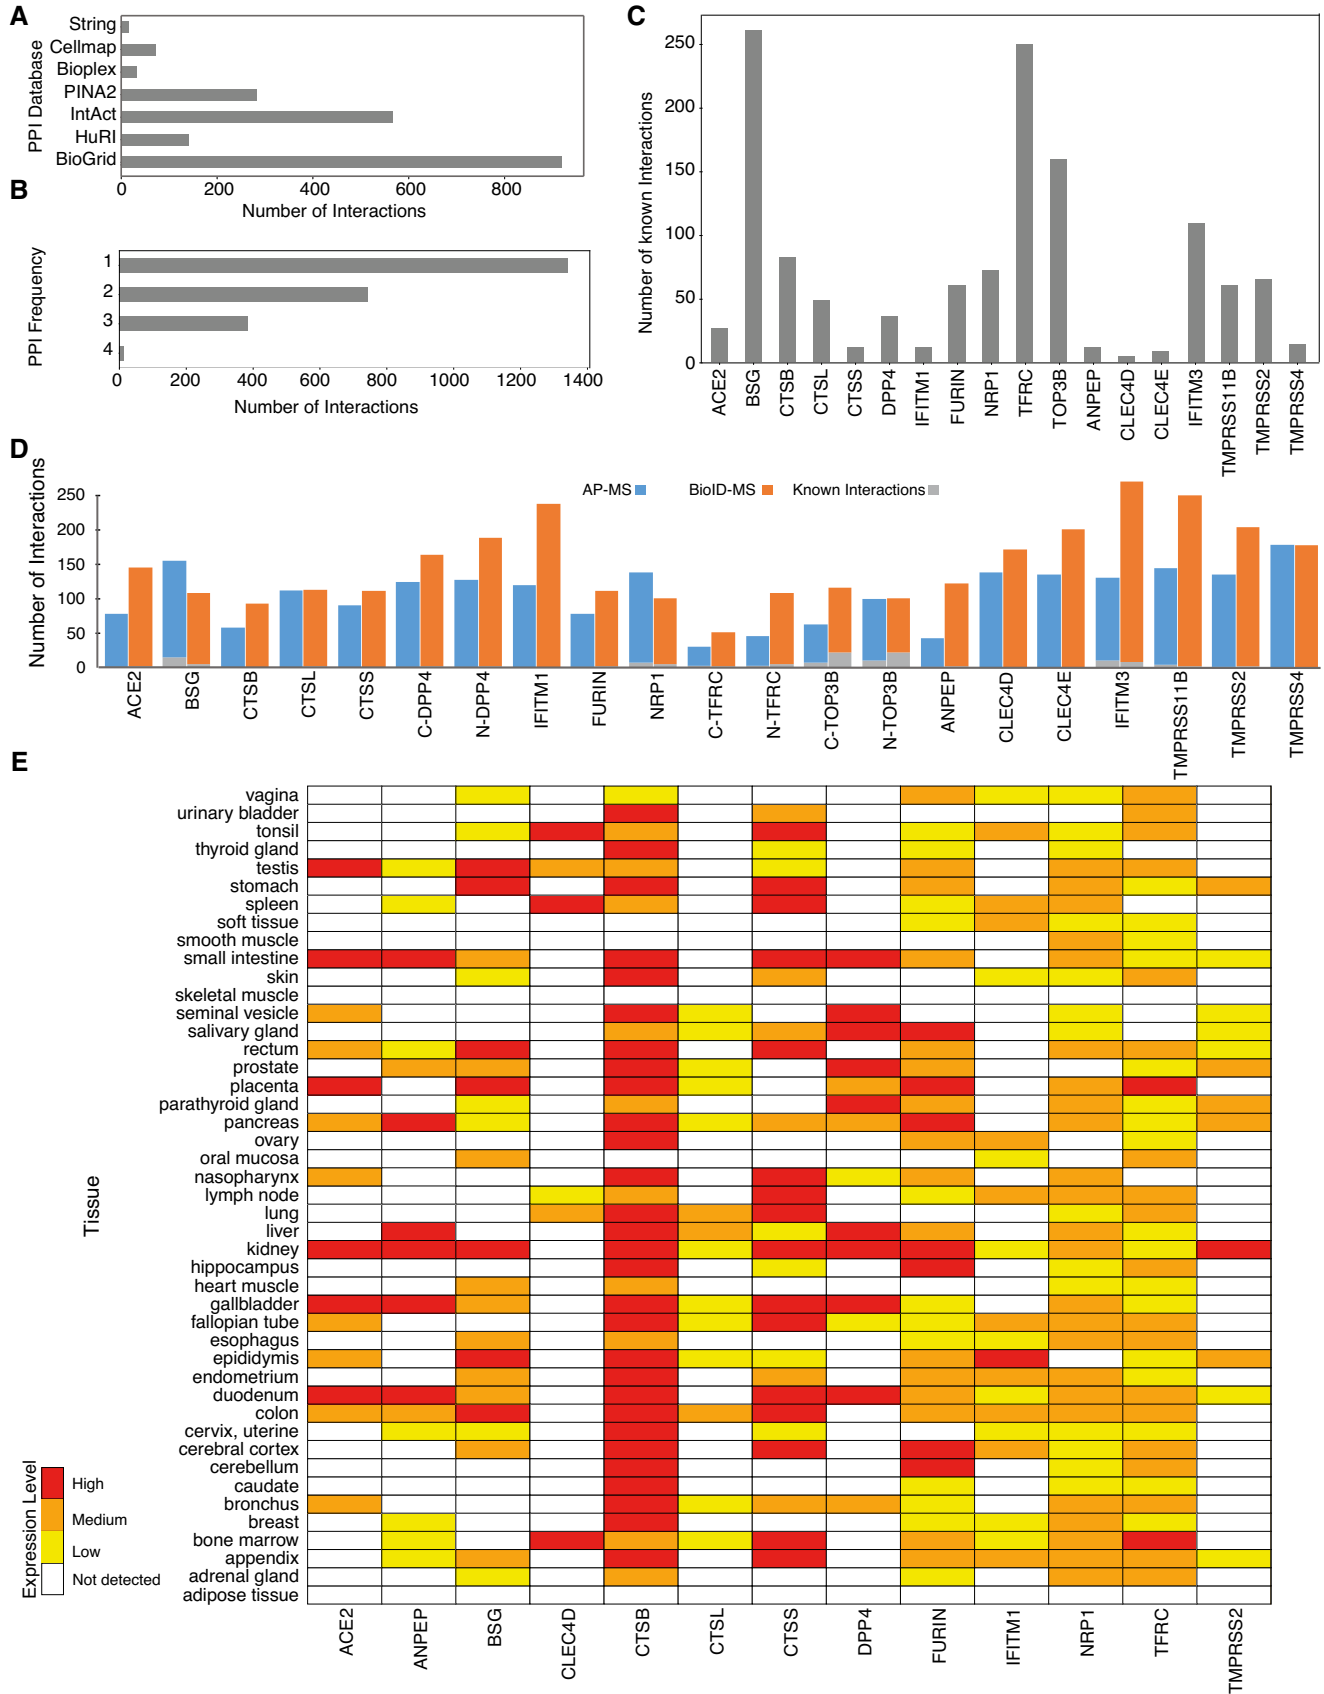

Figure EV1.

**Figure EV2. Defining the virus–host interaction landscape.**

- A, B Venn diagrams show high-confidence bait–prey interaction pair overlap of three virus–host PPI studies using either AP-MS (A) or BioID-MS (B). Duplicate PPIs were removed from each study.
- C The number of HCIs identified by viral baits using AP-MS or BioID-MS.
- D, E Frequency of prey proteins detected by baits using AP-MS (D) or BioID-MS (E).
- F, G Venn diagrams show high-confidence interactor overlap of three virus–host PPI studies using either AP-MS (F) or BioID-MS (G).

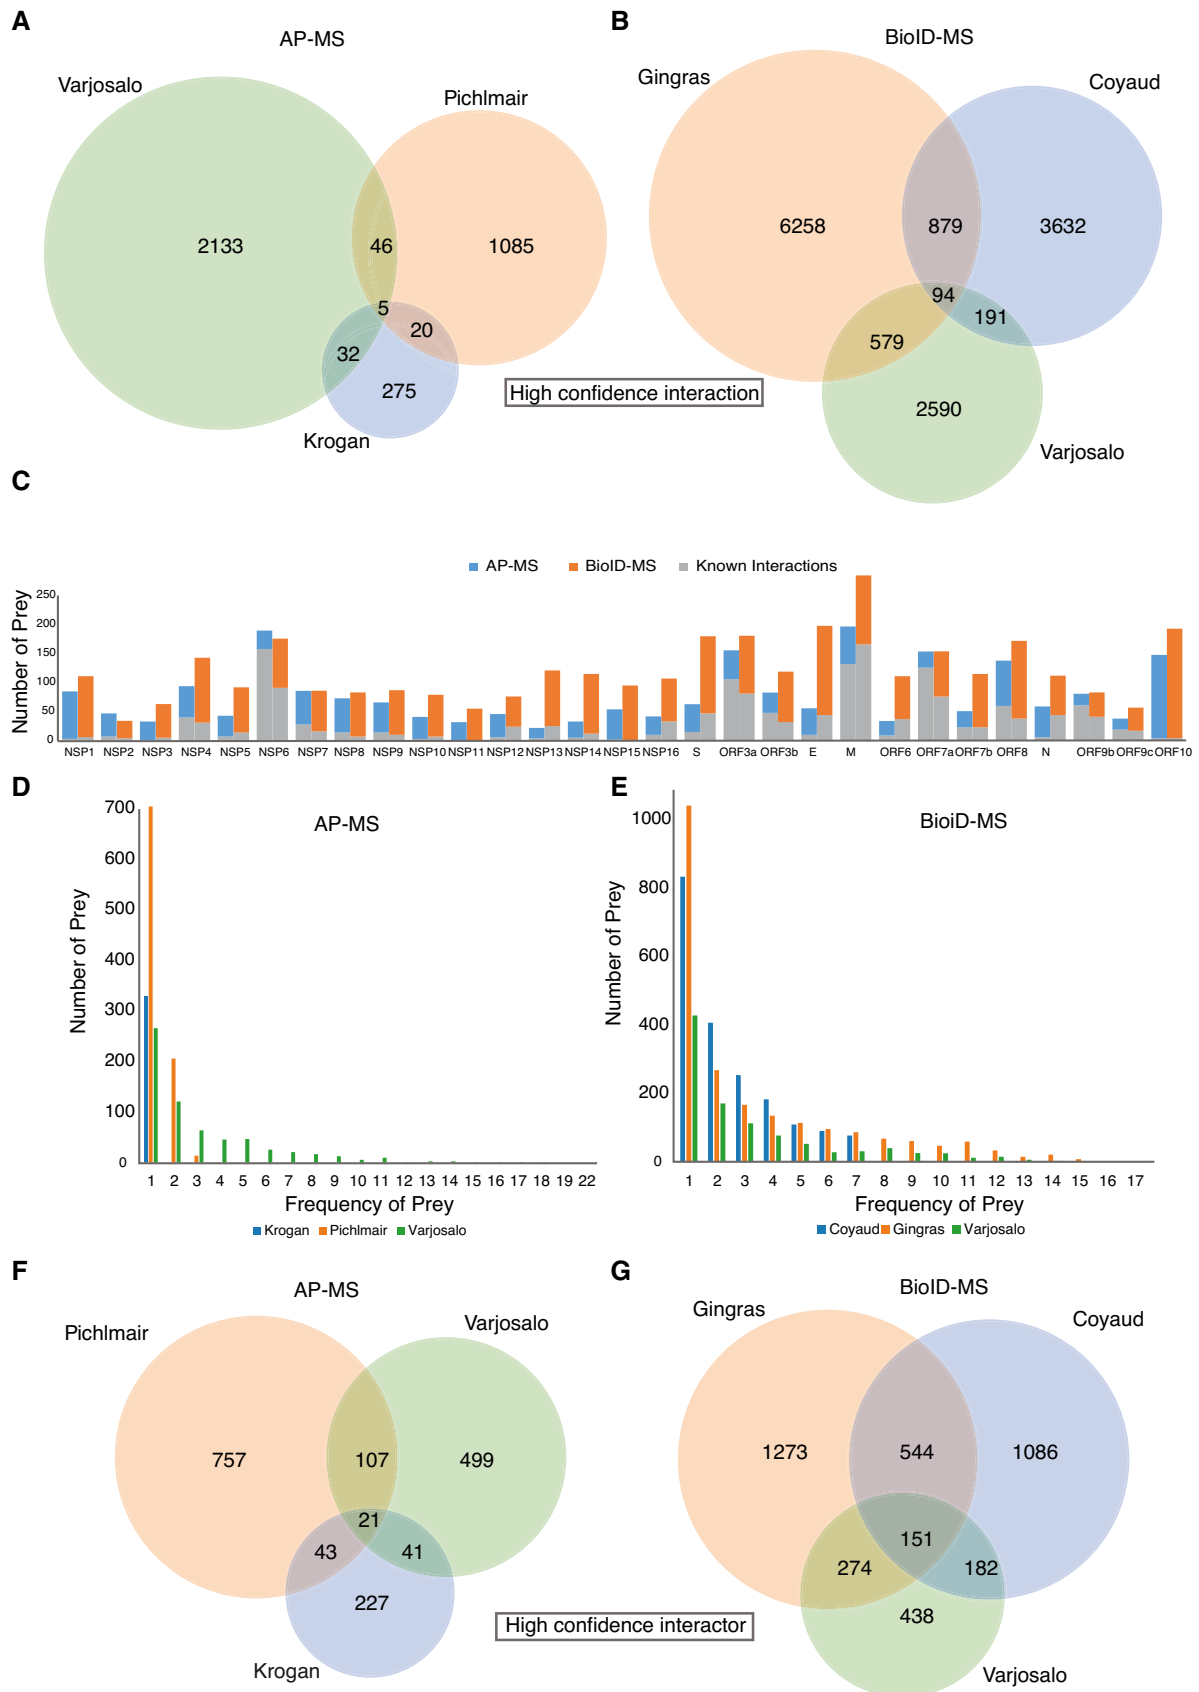

Figure EV2.

**Figure EV3. Validation of interaction data by Co-IP and dot blotting.**

A, B Proteomics interaction data were evaluated by Co-IP and dot blotting, related to Dataset EV6. In total, 190 randomly selected interaction pairs from both virus–host interactome (A) and receptor interactome (B) were confirmed by Co-IP. The prey protein tagged with a Strep-HA tag and bait protein tagged with V5 were co-expressed in HEK293 cells. The Strep-HA-tagged GFP with V5-tagged LacZ constructs was used as the negative control. Strep-HA-tagged proteins were immunoprecipitated with the Strep-Tactin Sepharose resin, and then, the immunoprecipitated complexes were analyzed by dot blotting with anti-V5 antibody and anti-HA antibody, respectively. Five percent of the total cell lysate was used as the input loading control.

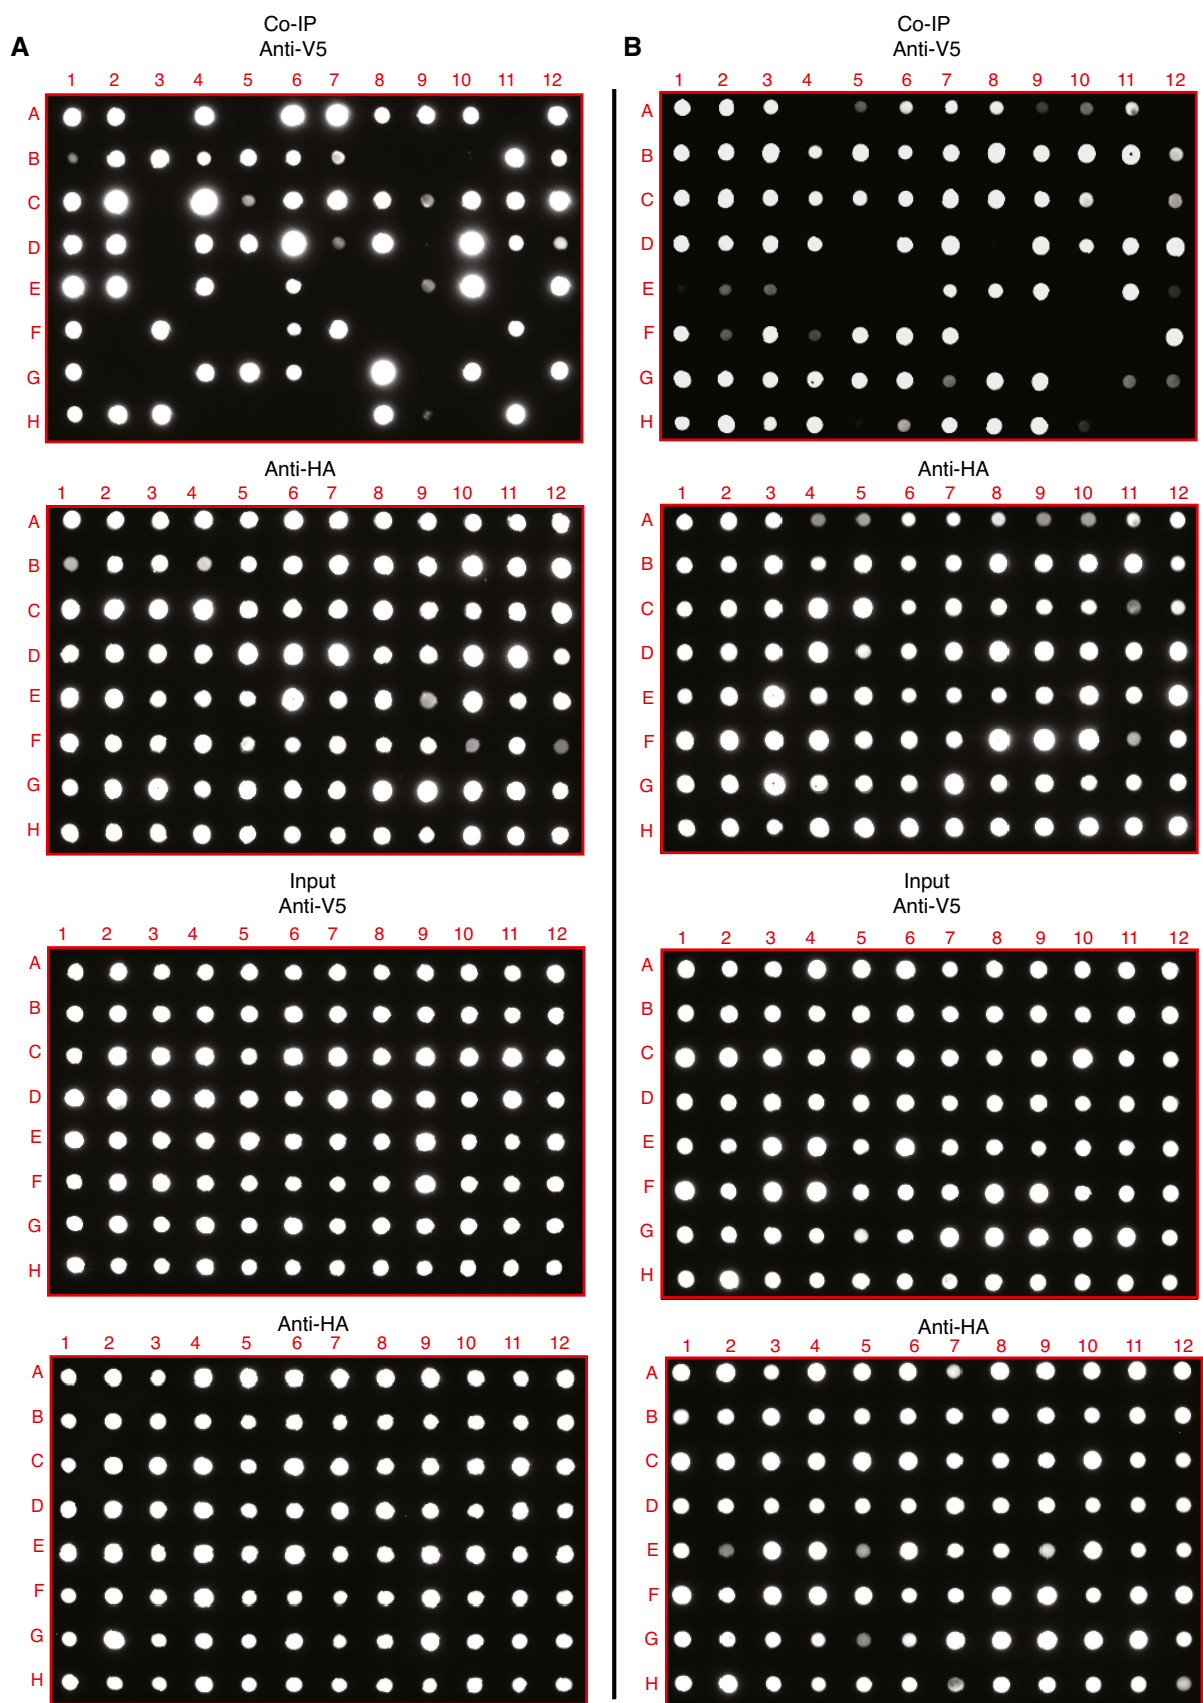

Figure EV3.

**Figure EV4. Unique subcellular structure upon overexpression of NSP3.**

- A Heatmap showing the molecular context of 29 viral bait proteins based on the annotation score of the MS-microscopy system. The color scheme is shown in the bottom part of the panel. The right-hand panel shows the architecture of the host cytoskeleton in NSP3-transfected U2-OS cells. F-actin was detected with phalloidin (Scale bar: 10  $\mu\text{m}$ ).
- B The heatmap shows average spectral counts for prey detected by MAC-tagged NSP3.
- C The summary of GO molecular function associated with high-confidence interactors of NSP3 was visualized by treemap. The size of each box was correlated to the *P*-value of the GO term.
- D Upregulated pathways in phosphoproteomic data of NSP3 were revealed by KEGG pathway analysis.

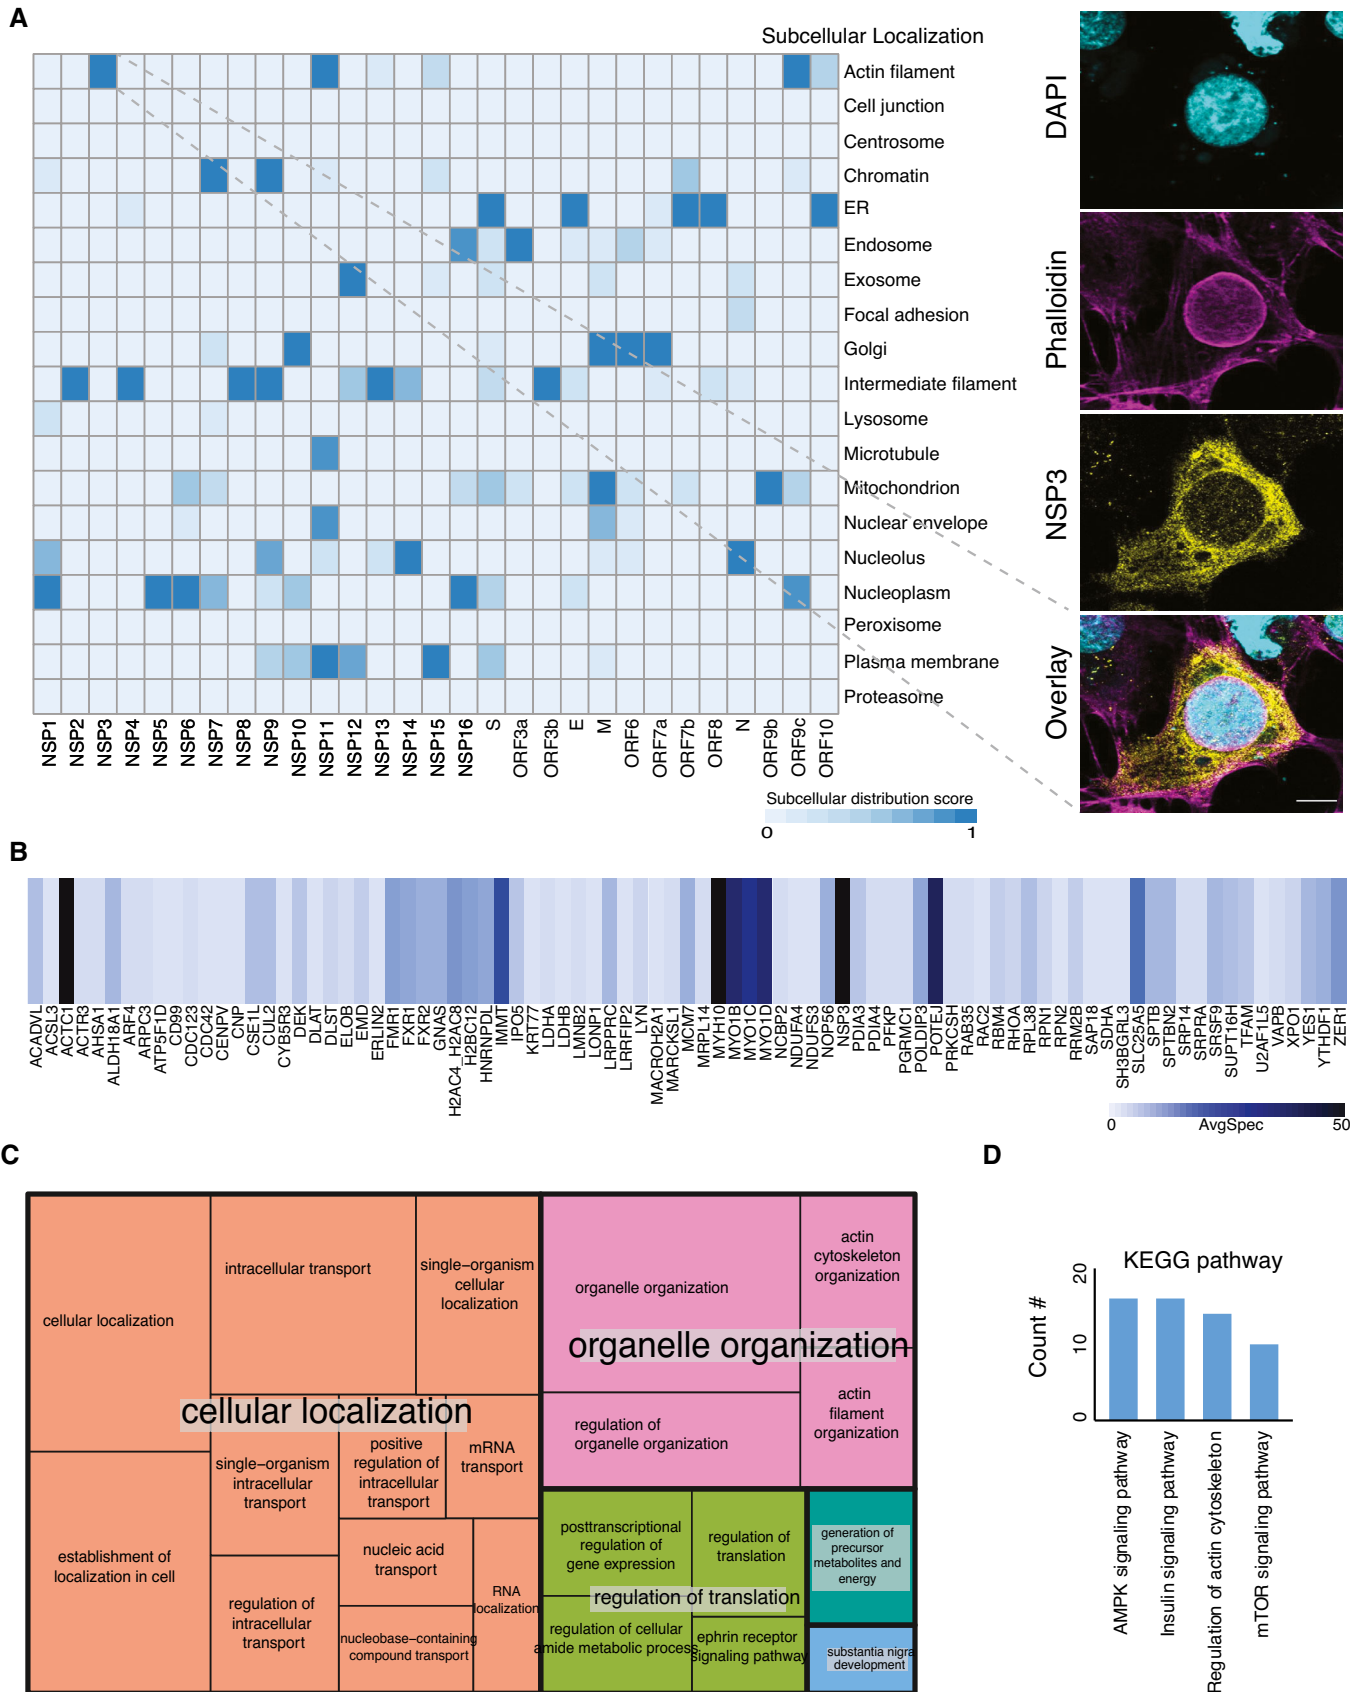

Figure EV4.



A

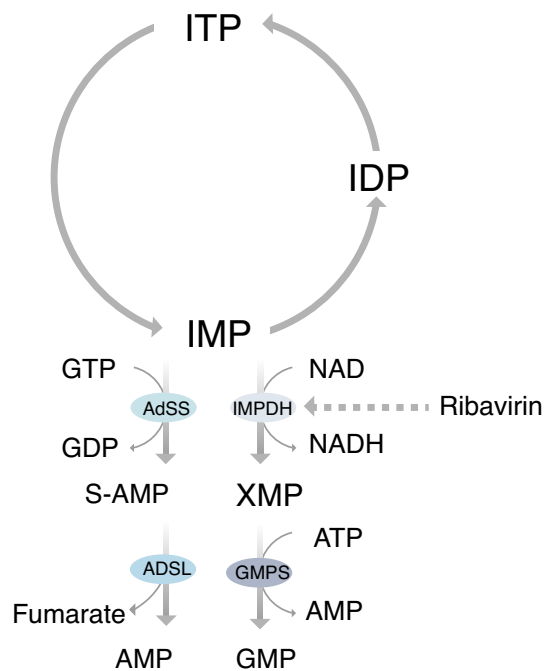

B

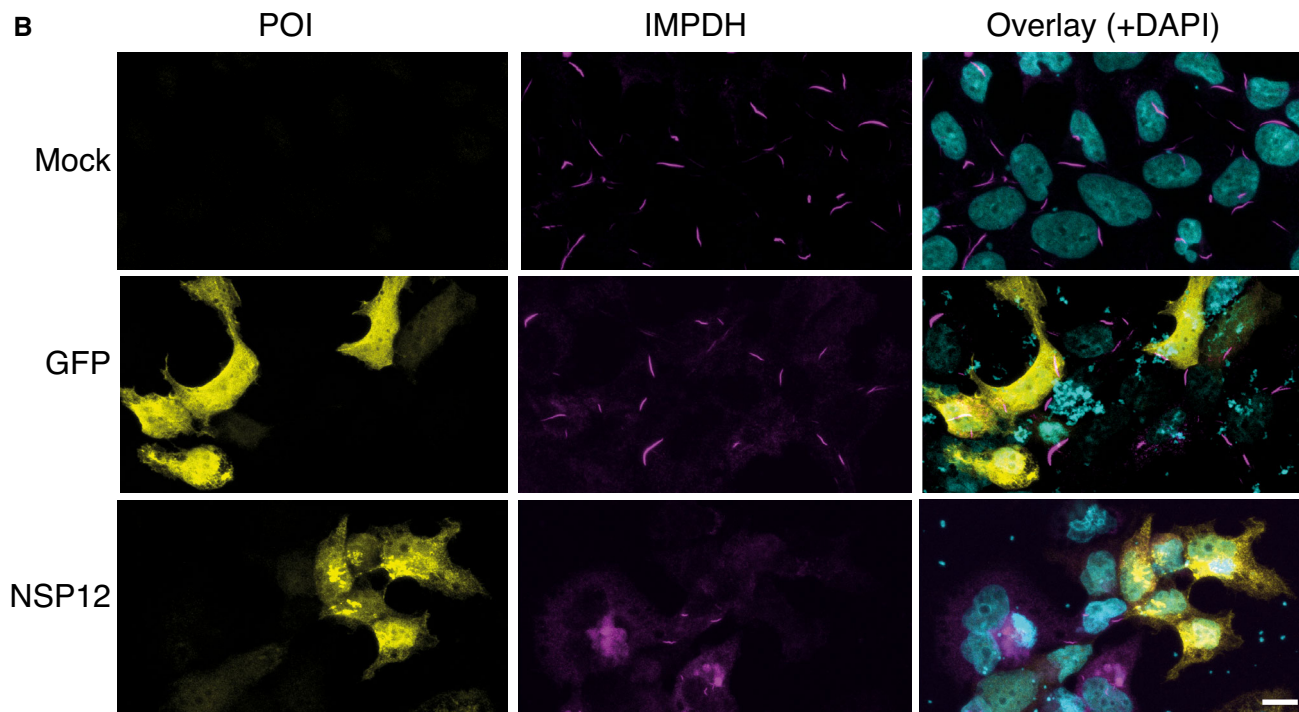

**Figure EV5. Overexpression of viral ORFs suppresses ribavirin-induced “rod and ring” structures.**

A Conversion of ITP to GMP and AMP, and the nucleotide salvage pathway. Ribavirin targets IMPDH to inhibit guanine synthesis.

B Representative immunofluorescence images showing the morphology of RR structures under ribavirin induction in untransfected and GFP-transfected cells. Transfection of viral ORF (NSP12) expression vectors suppresses ribavirin-induced RR structures. Scale bar: 10  $\mu$ m.
